# Supplementary material for: The Long-Term Evolutionary History of Gradual Reduction of CpG Dinucleotides in the SARS-CoV-2 Lineage
Source: MDPI journal article supplement (doi:10.3390/biology10010052), 2021-01-12
Supplement: s1 [file s1]

# Supplementary Material

## The long-term evolutionary history of gradual reduction of CpG dinucleotides in the SARS-CoV-2 lineage

Sankar Subramanian<sup>1,\*</sup>

<sup>1</sup> GeneCology Centre, School of Science and Engineering, University of the Sunshine Coast, Moreton Bay, Australia; [ssankara@usc.edu.au](mailto:ssankara@usc.edu.au)

\* Correspondence: [ssankara@usc.edu.au](mailto:ssankara@usc.edu.au)

Table S1. List of Betacoronavirus genomes used in this study.

| GenBank - Acc.No. | Subgenus      | Host     |
|-------------------|---------------|----------|
| JN874559.1        | Embecovirus   | Rabbit   |
| KF294357.1        | Embecovirus   | Bat      |
| KF294372.1        | Embecovirus   | Bat      |
| NC_017083.1       | Embecovirus   | Rabbit   |
| NC_026011.1       | Embecovirus   | Rat      |
| AY597011.2        | Embecovirus.  | Human    |
| KF906251.1        | Embecovirus.  | Camel    |
| KY419112.1        | Embecovirus.  | Pig      |
| LC061272.1        | Embecovirus.  | Horse    |
| MH810163.1        | Embecovirus.  | Yak      |
| NC_001846.1       | Embecovirus.  | Mouse    |
| NC_003045.1       | Embecovirus.  | Cow      |
| NC_006213.1       | Embecovirus.  | Human    |
| NC_006577.2       | Embecovirus.  | Human    |
| NC_012936.1       | Embecovirus.  | Rat      |
| NC_048217.1       | Embecovirus.  | Rat      |
| NC_025217.1       | Hibecovirus   | Bat      |
| KX442565.1        | Merbecovirus  | Bat      |
| MK907287.1        | Merbecovirus  | Hedgehog |
| MN611519.1        | Merbecovirus  | Bat      |
| MN611520.1        | Merbecovirus  | Bat      |
| KC545383.1        | Merbecovirus. | Hedgehog |
| KC545386.1        | Merbecovirus. | Hedgehog |
| KC667074.1        | Merbecovirus. | Human    |
| KC869678.4        | Merbecovirus. | Bat      |
| KJ473821.1        | Merbecovirus. | Bat      |
| KJ614529.1        | Merbecovirus. | Human    |
| MG021452.1        | Merbecovirus. | Human    |
| MG987421.1        | Merbecovirus. | Human    |
| NC_009019.1       | Merbecovirus. | Bat      |
| NC_009020.1       | Merbecovirus. | Bat      |
| NC_019843.3       | Merbecovirus. | Human    |
| NC_038294.1       | Merbecovirus. | Human    |
| NC_039207.1       | Merbecovirus. | Hedgehog |
| EF065514.1        | Nobecovirus.  | Bat      |
| EF065515.1        | Nobecovirus.  | Bat      |
| EF065516.1        | Nobecovirus.  | Bat      |
| HM211098.1        | Nobecovirus.  | Bat      |
| HM211099.1        | Nobecovirus.  | Bat      |
| HM211100.1        | Nobecovirus.  | Bat      |
| HM211101.1        | Nobecovirus.  | Bat      |

|              |               |            |
|--------------|---------------|------------|
| MG762674.1   | Nobecovirus.  | Bat        |
| NC_009021.1  | Nobecovirus.  | Bat        |
| MK211374.1   | Sarbecovirus  | Bat        |
| NC_014470.1  | Sarbecovirus  | Bat        |
| AY304486.1   | Sarbecovirus. | Civet      |
| AY304488.1   | Sarbecovirus. | Civet      |
| AY572034.1   | Sarbecovirus. | Civet      |
| AY613950.1   | Sarbecovirus. | Civet      |
| DQ071615.1   | Sarbecovirus. | Bat        |
| DQ412042.1   | Sarbecovirus. | Bat        |
| DQ412043.1   | Sarbecovirus. | Bat        |
| JX993987.1   | Sarbecovirus. | Bat        |
| JX993988.1   | Sarbecovirus. | Bat        |
| KC881005.1   | Sarbecovirus. | Bat        |
| KC881006.1   | Sarbecovirus. | Bat        |
| KF367457.1   | Sarbecovirus. | Bat        |
| KF569996.1   | Sarbecovirus. | Bat        |
| KJ473811.1   | Sarbecovirus. | Bat        |
| KJ473812.1   | Sarbecovirus. | Bat        |
| KJ473813.1   | Sarbecovirus. | Bat        |
| KJ473814.1   | Sarbecovirus. | Bat        |
| KJ473815.1   | Sarbecovirus. | Bat        |
| KJ473816.1   | Sarbecovirus. | Bat        |
| KP886808.1   | Sarbecovirus. | Bat        |
| KP886809.1   | Sarbecovirus. | Bat        |
| KY352407.1   | Sarbecovirus. | Bat        |
| MG772933.1   | Sarbecovirus. | Bat        |
| MG772934.1   | Sarbecovirus. | Bat        |
| MN996532.1   | Sarbecovirus. | Bat        |
| MT040333.1   | Sarbecovirus. | Pangolin   |
| MT040334.1   | Sarbecovirus. | Pangolin   |
| MT040335.1   | Sarbecovirus. | Pangolin   |
| MT040336.1   | Sarbecovirus. | Pangolin   |
| MT072864.1   | Sarbecovirus. | Pangolin   |
| MT121216.1   | Sarbecovirus. | Pangolin   |
| MT782114.1   | Sarbecovirus. | Bat        |
| NC_004718.3  | Sarbecovirus. | Human      |
|              |               | Human,     |
|              |               | mink,      |
| NC_045512.2  |               | tiger, dog |
| (SARS-Cov-2) | Sarbecovirus. | and cat    |
